# Supplementary material for: CEP19 cooperates with FOP and CEP350 to drive early steps in the ciliogenesis programme
Source: Open Biol. 2017 Jun 28;7(6):170114. doi: 10.1098/rsob.170114 (PMC5493781; doi:10.1098/rsob.170114)
Supplement: Table S2 [file rsob170114supp2.xlsx]

## Sheet: Antibodies
Primary antibodies	Species	Source/Catalog Number
anti-CEP19	rabbit polyclonal	Gift from Dr. Basto
anti-CEP350	rabbit polyclonal	Cedarlane/Novus Biologicals NB100-59811
anti-GFP	goat polyclonal	Gift from D. Drechsel
anti-GFP	mouse monoclonal	Roche (11 814 460 001)
anti-ARL13B	rabbit polyclonal	Proteintech 17711-1
anti-PCNT	rabbit polyclonal	Abcam Ab4448
anti-CEP164	rabbit polyclonal	Novus Biologicals 45330002
anti-Ninein	rabbit polyclonal	Abcam ab52473
anti-CP110	rabbit polyclonal	Bethyl Laboratories A301-343A-1
anti-CEP120	rabbit polyclonal	Xie Z, Moy LY, Sanada K, Zhou Y, Buchman JJ, Tsai LH. Cep120 and TACCs control interkinetic nuclear migration and the neural progenitor pool. Neuron. 2007 Oct 4;56(1):79-93. PubMed PMID: 17920017
anti-CEP128	rabbit polyclonal	Abcam Ab118797
anti-CEP170	rabbit polyclonal	Bethyl IHC-00265
anti-FGFR1OP (FOP)	rabbit polyclonal	Proteintech 1143-1-AP
anti-g-tubulin (clone GTU-88)	mouse monoclonal	Sigma-Aldrich T6557
anti-a-tubulin (Clone DM 1A)	mouse monoclonal	Sigma-Aldrich T6199
anti-polyglutamylated tubulin (GT335)	mouse monoclonal	AdipoGen AG-20B-0020
Secondary antibodies/probes	Species	Source
anti-rabbit Alexa488/594/647	donkey	Life Technologies
anti-mouse Alexa488/594/647	donkey	Life Technologies
anti-goat Alexa488/594/647	donkey	Life Technologies
anti-goat IgG HRP	cow	Jackson Immunoresearch
anti-mouse IgG HRP	goat	Bio-Rad
anti-rabbit IgG HRP	goat	Bio-Rad
